# Supplementary material for: Transcriptomic Characterization of Postmolar Gestational Choriocarcinoma
Source: MDPI journal article supplement (doi:10.3390/biomedicines9101474), 2021-10-14
Supplement: s1 [file s1]

## Supplementary table S1

| Gene name    | Accession      | Position  | Target sequence                                                                                       |
|--------------|----------------|-----------|-------------------------------------------------------------------------------------------------------|
| CCL5         | NM_002985.2    | 281-380   | AGTGTGTGCCAACCAGAGAAGAAATGGGTTTCGGGAGTACATCAACTCTTTGGAGATGAGCTAGGATGGAGAGTCCTGAACCTGAACCTACACAAATTT   |
| CD2          | NM_001767.3    | 688-787   | GCAGCCTCTTGATGGTCTTTGTGGCACTGCTCGTTTTCTATATCACCAAAGGAAAAACAGAGGAGTCGGAGAAATGATGAGGAGCTGGAGACAAGAGC    |
| CD27         | NM_001242.4    | 1102-1201 | GTCAGGGCCCTTTCTGTGTACACGTGACAGAGTGCCTTTTCGAGACTGGCAGGGACGAGGACAAATATGGATGAGGTGGAGAGTGGGAAGCAGGAGCCC   |
| CD274        | NM_014143.3    | 50-149    | AGCTTCCCAGGCTCCGACCCAGCCGCGCTTCTGTCCGCTGCAGGGCATTCCAGAAAGATGAGGATATTTGCTGTCTTTATATTGATGACCTACTGGCA    |
| CD276        | NM_001024736.1 | 2121-2220 | ACATTTCTTAGGGACACAGTACACTGACCACATCACACCCTCTTCTCCAGTGTGCGTGGACCATCTGGCTGCCCTTTTTCTCCAAAAGATGCAATAT     |
| CD3D         | NM_000732.4    | 111-210   | TATCTACTGGATGAGTTCGCTGGGAGATGGAACATAGCACGTTTCTCTCTGGCCTGGTACTGGCTACCCTTCTCTCGCAAGTGAGCCCTTCAAGATAC    |
| CD8A         | NM_001768.5    | 1321-1420 | GCTCAGGGCTCTTCTCCACACCATTCAGGTCTTTCTTCCGAGGCCCTGTCTCAGGGTGAGGTGCTTGAGTCTCCAACGGCAAGGGAACAAGTACTT      |
| CIITA        | NM_000246.3    | 3048-3147 | CTTCCCCAAACTGGTGCGGATCCTCAGCGCCTTTCTCTCCCTGCAGCATCTGGACCTGGATGCGCTGAGTGAGAACAGATCGGGGACGAGGGTGTCTC    |
| CMKLR1       | NM_004072.1    | 771-870   | CAACGTCTTCTCCCAATCATATCACCTATGCCGCCATGGACTACCACTGGGTTTTTCGGGACAGCCATGTGCAAGTACAGCAACTTCTTCTCATCCAC    |
| CTLA-4       | NM_005214.3    | 406-505   | AGTCTGTGCGGCAACCTACATGATGGGAATGAGTTGACCTTCTAGATGATTCCATCTGCACGGGCACCTCCAGTGGAATCAAGTGAACCTCACTATC     |
| CXCL10       | NM_001565.2    | 462-561   | GCCATAATTGTTCTTAGTTTGAGTTACACTAAAGGTGACCAATGATGGTCACCAATCAGCTGCTACTCTCTGTAGGAAGGTTAATGTTTCATCATC      |
| CXCL13       | NM_006419.2    | 211-310   | AGACGCTTCATTGATGCAATTCAAATCTTGCCCCGTGGGAATGGTTGTCCAAGAAAAGAAATCATAGTCTGGAAGAAGAACAAGTCAATTGTGTGTGG    |
| CXCL9        | NM_002416.1    | 1976-2075 | CACCATCTCCCATGAAGAAGGGAACGCGTGAAGTACTAAGCGCTAGAGGAAGCAGCCAAGTCGGTTAGTGGAAAGCATGATTGGTGCCAGTTAGCCTCTG  |
| CXCR6        | NM_006564.1    | 96-195    | TTACCATGAAGACTATGGGTTCAAGCATTTCAATGACAGCAGCCAGGAGGAGCATCAAGACTTCTCGCAGTTACGAAGGCTTTCTGCCCTGCATGTAC    |
| ERVW-1       | NM_014590.3    | 1991-2090 | AAGAGTACCATTCTTCTTTTGTATAGGAGCAGGAGTGTAGGTGCACTAGGTACTGGCATTGGCGGTATCACAACCTCTACTAGTTCTACTACAAA       |
| HAVCR2       | NM_032782.3    | 956-1055  | TATATGAAGTGGAGGAGCCCAATGAGTATTATTGCTATGTGACAGCAGGCAGCAACCTCACAACCTTTGGGTTGTCGCTTTGCAATGCCATAGATCCA    |
| HLA-DQA1     | NM_002122.3    | 262-361   | GGTGGCCTGAGTTGAGCAAAATTTGAGGTTTTGACCCGAGGGTGCACTGAGAAACATGGCTGTGGCAAAACACAACTTGAACATCATGATTAAACGCTA   |
| HLA-DRA      | NM_019111.3    | 336-435   | GGCCAACATAGCTGTGGACAAAGCCAACTGGAAATCATGACAAAGCGCTCCAACATACTCCGATCACCAATGTACCTCCAGAGGTAAGTGTGCTCACG    |
| HLA-DRB1     | NM_002124.3    | 748-847   | AGCACGGTCTGAATCTGCACAGAGCAAGATGCTGAGTGGAGTCGGGGGCTTTGTGCTGGGCCTGCTCTCTTGGGGCCGGGCTGTTCATCTACTTCAGG    |
| HLA-E        | NM_005516.4    | 1205-1304 | TGTCTTAGGGGACTCTGGCTTCTCTTTTGCAGGGCCCTCTGAATCTGTCTGTGTCCCTGTTAGCACAATGTGAGGAGGTAGAGAAACAGTCCACCTCTG   |
| HLA-G        | NM_002127.4    | 1181-1280 | AAGAGCTCAGATTGAAAAGGAGGAGCTACTCTCAGGCTGCAATTGTAAACAGCTGCCCTGTGTGGGACTGAGTGGCAAGTCCCTTTGTGACTTCAAGAA   |
| IDO1         | NM_002164.3    | 51-150    | CTATTATAAGATGCTCTGAAAACCTCTCAGACACTGAGGGGCACAGAGGAGCAGACTACAAGAATGGCACACGCTATGGAACCTCTGGACAATCAGT     |
| LAG3         | NM_002286.5    | 1736-1835 | CTTTTGGTGACTGGAGCCTTTGGCTTTACCTTTTGAGAGAAGACAGTGGCGACCAAGACGATTTTCTGCCTTAGAGCAAGGGATTACCCCTCCGAGGCTC  |
| NCAM1        | NM_000615.5    | 1621-1720 | GGTATTTGCCTATCCCAGTGCCACGATCTCATGTTTTCGGGATGGCCAGCTGCTGCCAAGCTCCAATTACAGCAATATCAAGATCTACAACACCCCTCT   |
| NKG7         | NM_005601.3    | 633-732   | CTGTGGCGGTCCCGCTCCTGGCTATGAAACCTTGTGAGCAGAAGGCAAGAGCGGCAAGATGAGTTTTGAGCGTTGTATTCCAAAGGCCTCATCTGGAGCC  |
| PDCD1        | NM_005018.2    | 311-410   | CTTCCCCGAGGACCGCAGCCAGCCCGGCCAGGACTGCCGCTTCCGTGTCACACAAC TGCCCAACGGGCGTGACTTCCACATGAGCGTGGTCAGGGCCCGG |
| PDCD1LG2     | NM_025239.3    | 236-335   | TGTGGAGCTGTGGCAAGTCTCATATCAAATACAGAACATGATCTTCTCTGCTAATGTTGAGCCTGGAATTGCAGCTTACCAGATAGCAGCTTTATT      |
| PSMB10       | NM_002801.2    | 222-321   | ACCATCGCGGGCCTGGTGTTCGAAGACGGGTCATTCTGGGCGCCGATACGCGAGCCACTAACGATTGCGTGTGGCGGACAAAGCTGCGAGAAGATCC     |
| TIGIT        | NM_173799.2    | 1969-2068 | TGGATCTTAGAAGACTTTTATCCTTCCACCATCTCTCTCAGAGGAATGAGCGGGGAGTTGGATTTACTGGTGACTGATTTTCTTCATGGGCCAAGGAA    |
| VISTA (VSIR) | NM_022153.1    | 1956-2055 | CTGGGACACTCTGAGTATGAAGCGGGATGCTATTAATAAATACTACATGGGGAACAGGTGCAAAACCTGGAGATGGATTGTAAGAGCCAGTTTAAATCTGC |

## Supplementary table S1. Custom gene panel.
